# Supplementary material
Source: PubMed Central journal article supplement (PMC7392979)
Supplement: 11524_2020_464_MOESM1_ESM.pdf [file 11524_2020_464_MOESM1_ESM.pdf]

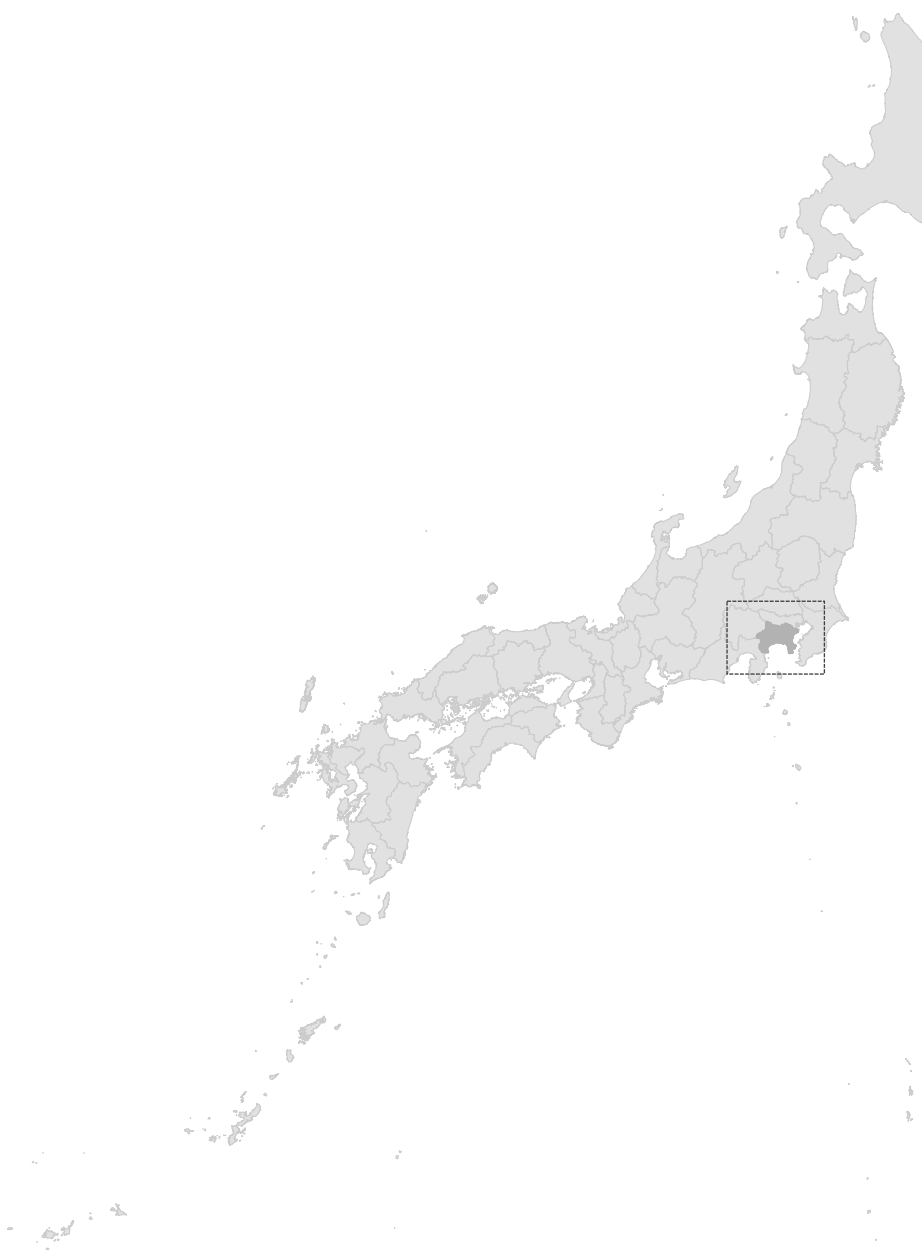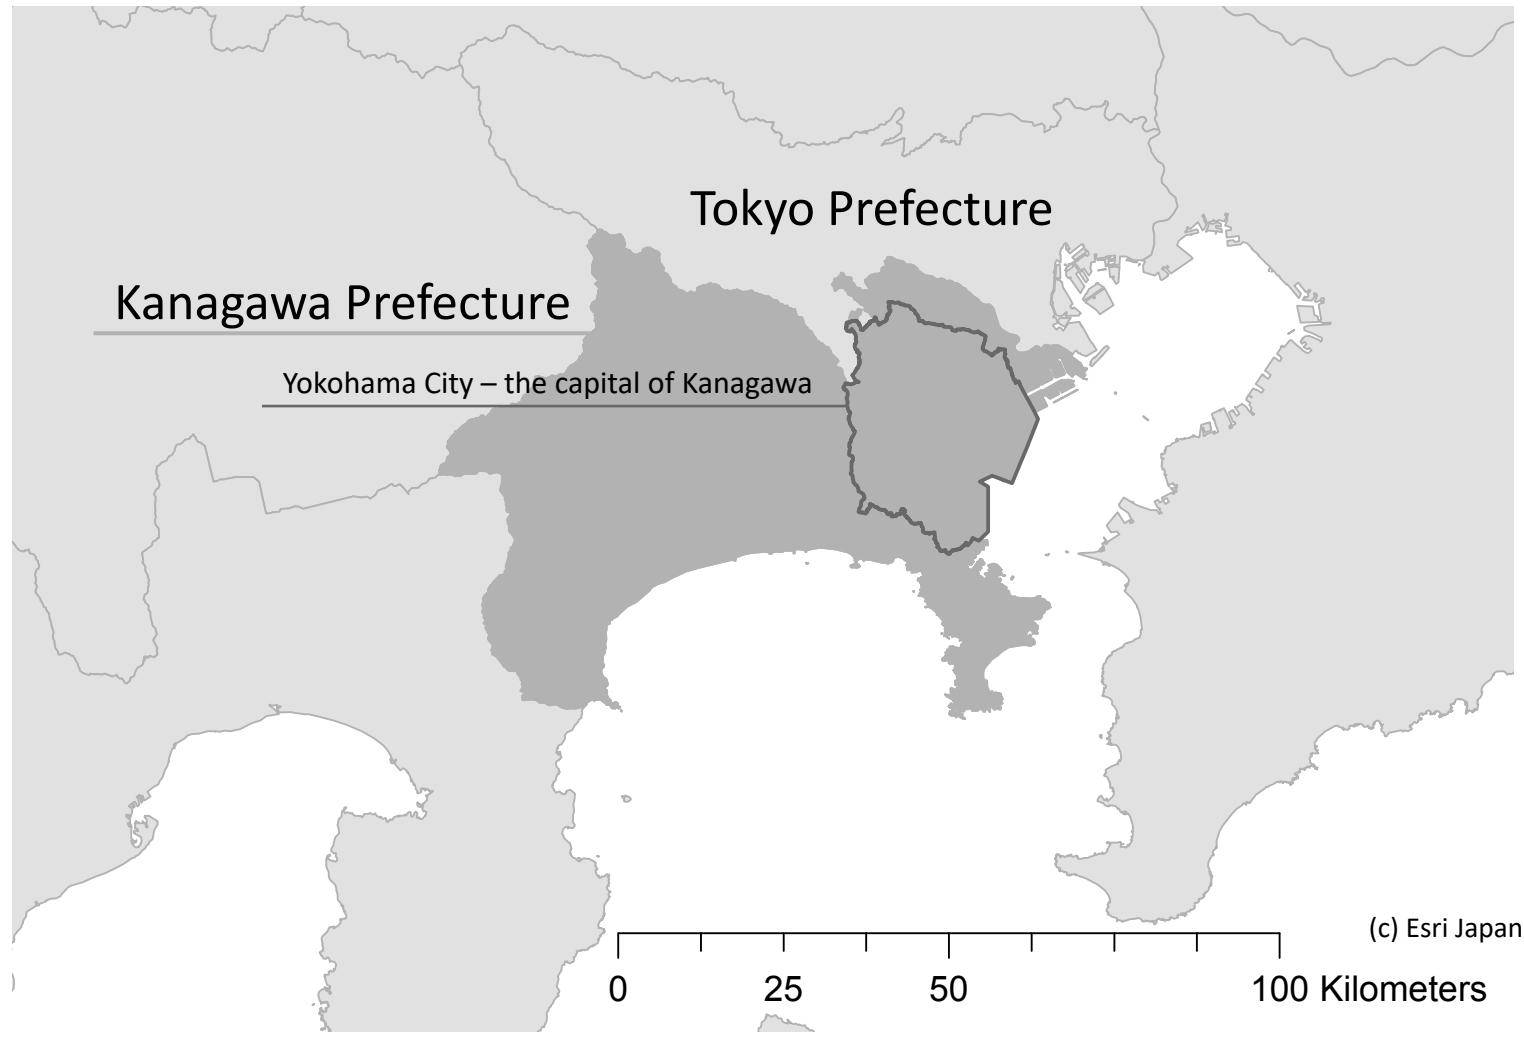

(c) Esri Japan

0 25 50 100 Kilometers
