# Supplementary material
Source: PubMed Central journal article supplement (PMC7392979)

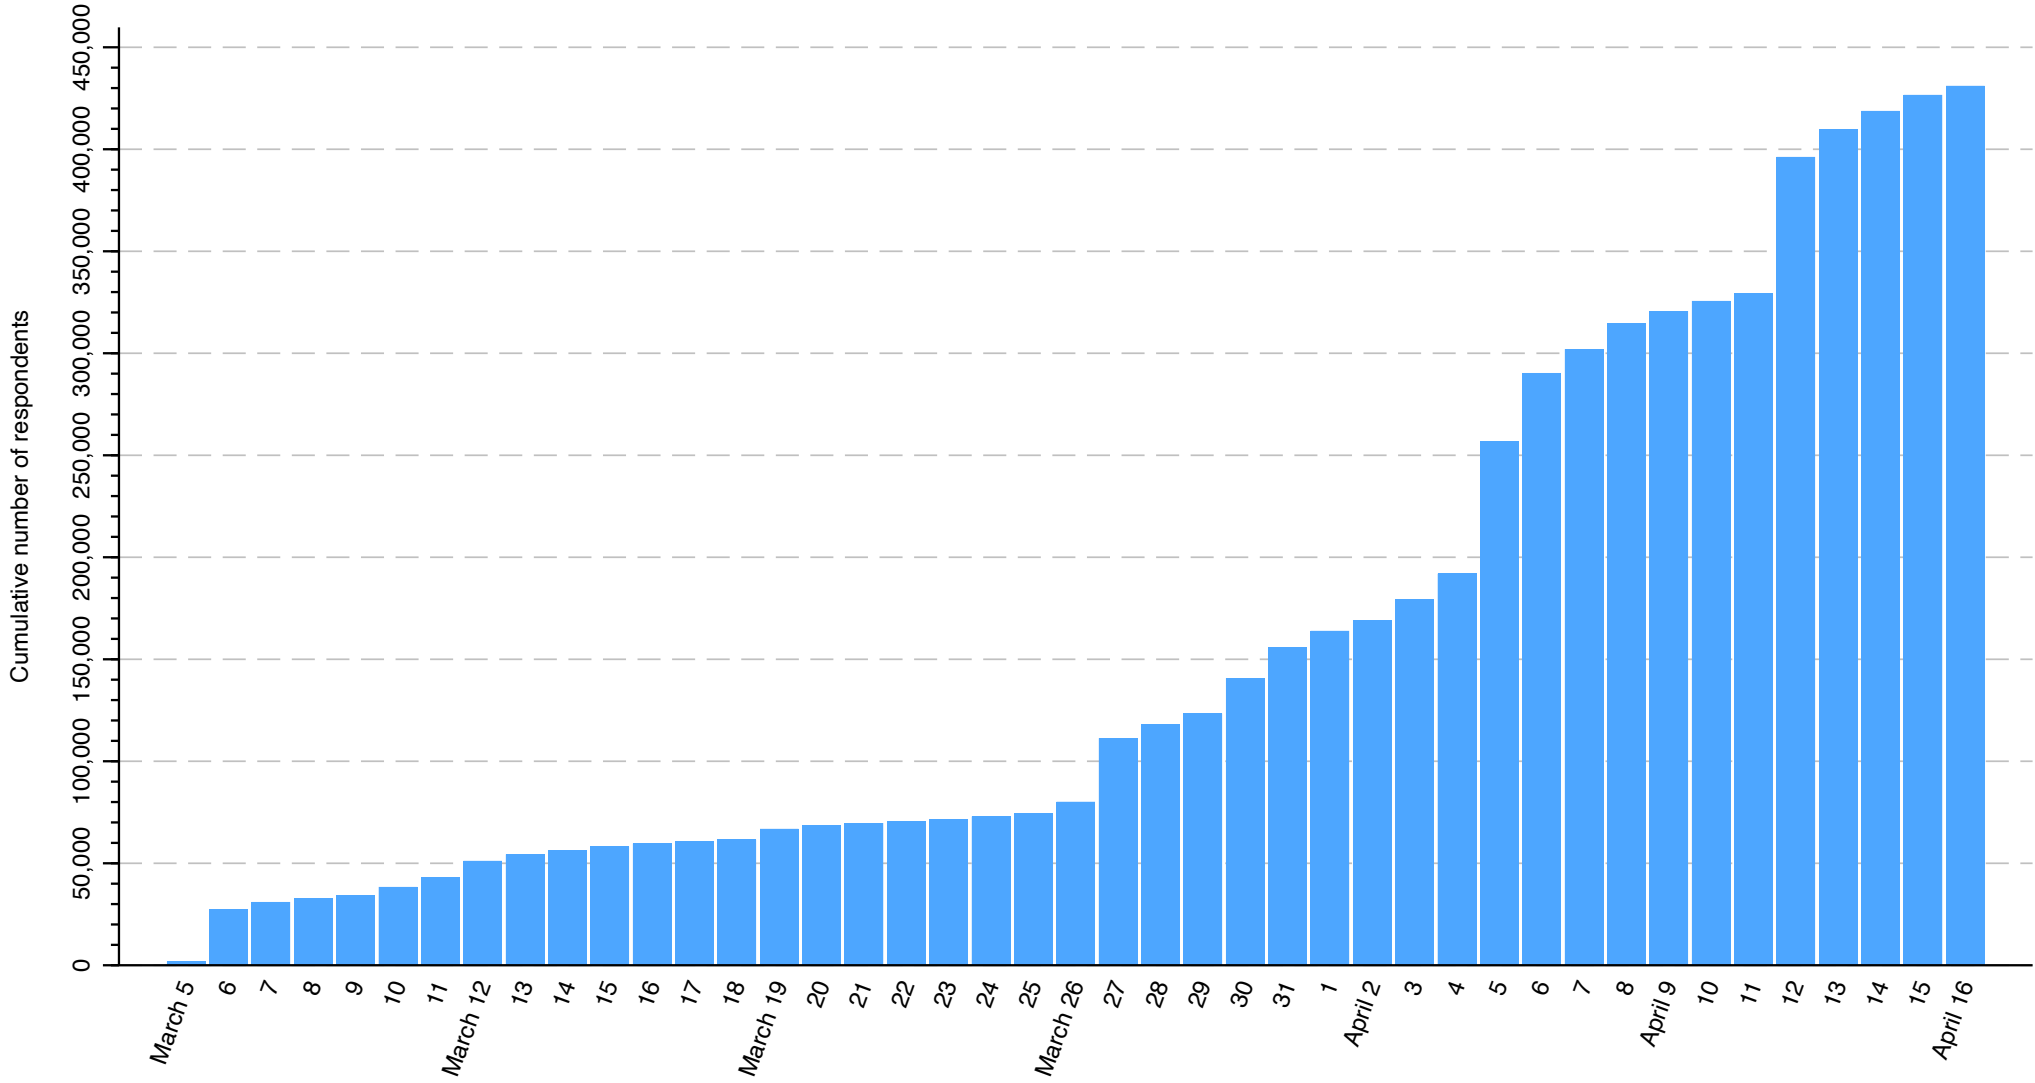

Supplement: 11524_2020_464_MOESM2_ESM.pdf [file 11524_2020_464_MOESM2_ESM.pdf]
